# Supplementary material for: Measurement report: The Fifth International Workshop on Ice Nucleation phase 1 (FIN-01): intercomparison of single-particle mass spectrometers
Source: Copernicus journal article supplement (doi:10.5194/acp-24-10869-2024), 2024-09-26
Supplement: Supplementary file 1 [file acp-24-10869-2024-supplement.pdf]

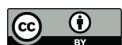

*Supplement of*

**Measurement report: The Fifth International Workshop  
on Ice Nucleation phase 1 (FIN-01): intercomparison  
of single-particle mass spectrometers**

**Xiaoli Shen et al.**

*Correspondence to:* Xiaoli Shen (xlshen@purdue.edu)

The copyright of individual parts of the supplement might differ from the article licence.

Supporting information

Table S1: Average correlation coefficients of the average spectra analyzed by the different SPMs.

| Aerosol type          | $r_{\text{avg-pos}}$ | $r_{\text{avg-neg}}$ |
|-----------------------|----------------------|----------------------|
| K-feldspar            | $0.73 \pm 0.12$      | $0.57 \pm 0.41$      |
| Illite NX             | $0.71 \pm 0.13$      | $0.78 \pm 0.08$      |
| Moroccan desert dust  | $0.66 \pm 0.14$      | $0.89 \pm 0.05$      |
| Argentinian soil dust | $0.71 \pm 0.09$      | $0.85 \pm 0.06$      |
| Propane soot          | $0.51 \pm 0.23$      | $0.35 \pm 0.26$      |
| $\alpha$ -pinene SOA  | $0.80 \pm 0.14$      | $0.30 \pm 0.29$      |
| SOA-coated K-feldspar | $0.89 \pm 0.02$      | $0.73 \pm 0.03$      |
| Snomax                | $0.92 \pm 0.04$      | $0.90 \pm 0.05$      |

Note that, the  $r_{\text{avg-pos}}$  and  $r_{\text{avg-neg}}$  are the average Pearson’s correlation coefficients for the average positive and negative spectra, respectively.

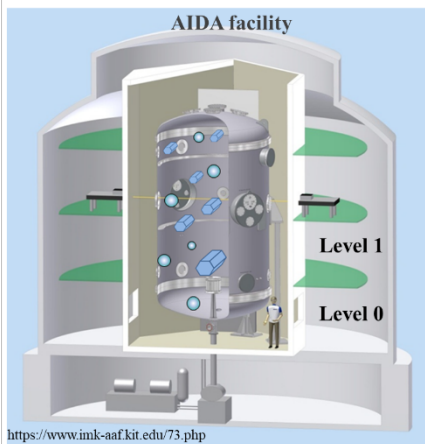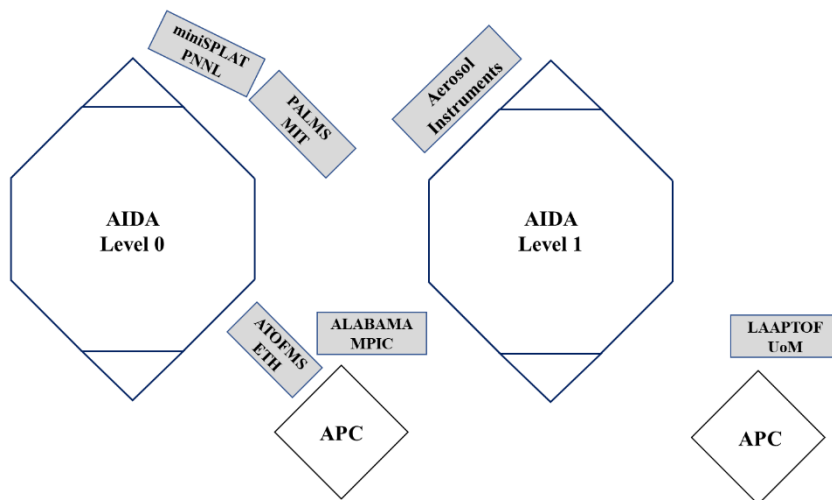

**Figure S1: Experimental setup.** During the campaign the instruments were positioned to minimize the length of the sampling lines to the AIDA and APC chambers. The sampling lines were  $6 \times 4$  mm (OD  $\times$  ID) stainless steel tubing.

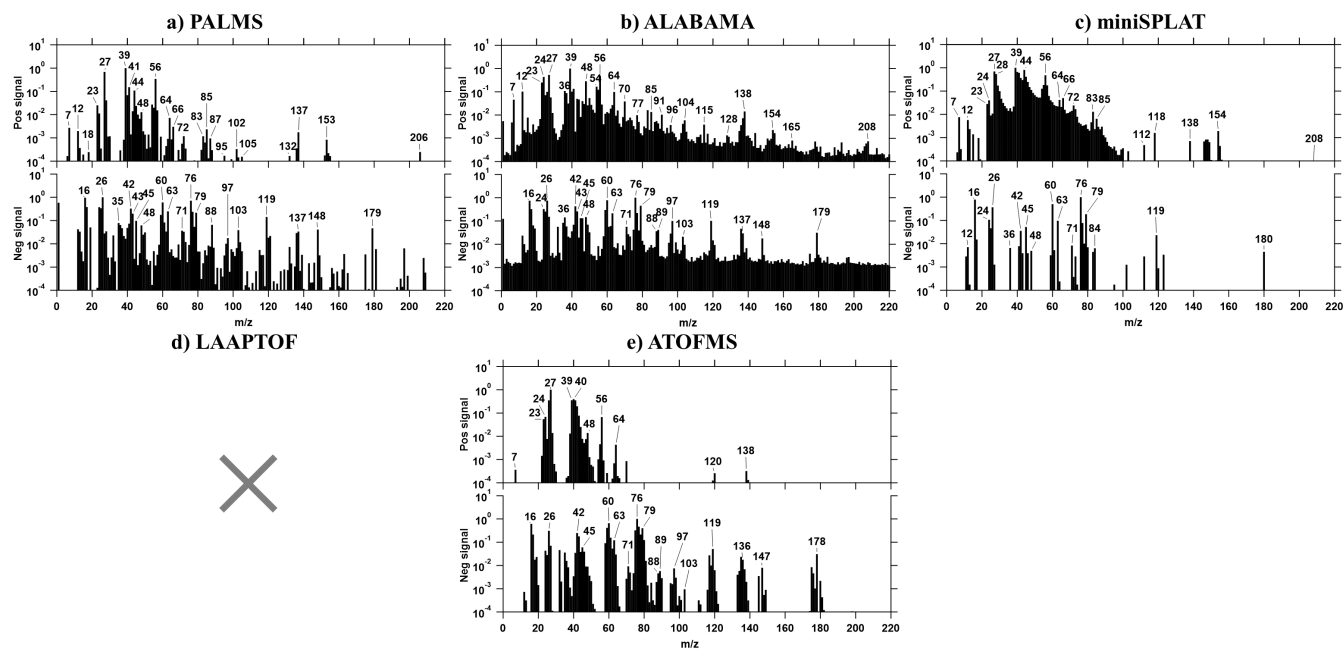

Figure S2: Normalized average mass spectral signal of Argentinian soil dust from a) PALMS, b) ALABAMA, c) miniSPLAT, d) LAAPTOF and e) ATOFMS, respectively. The cross “X” symbol denotes the case where no data is available. The number of spectra averaged for each is 870 a), 617 b), 669 c), and 3080 e).

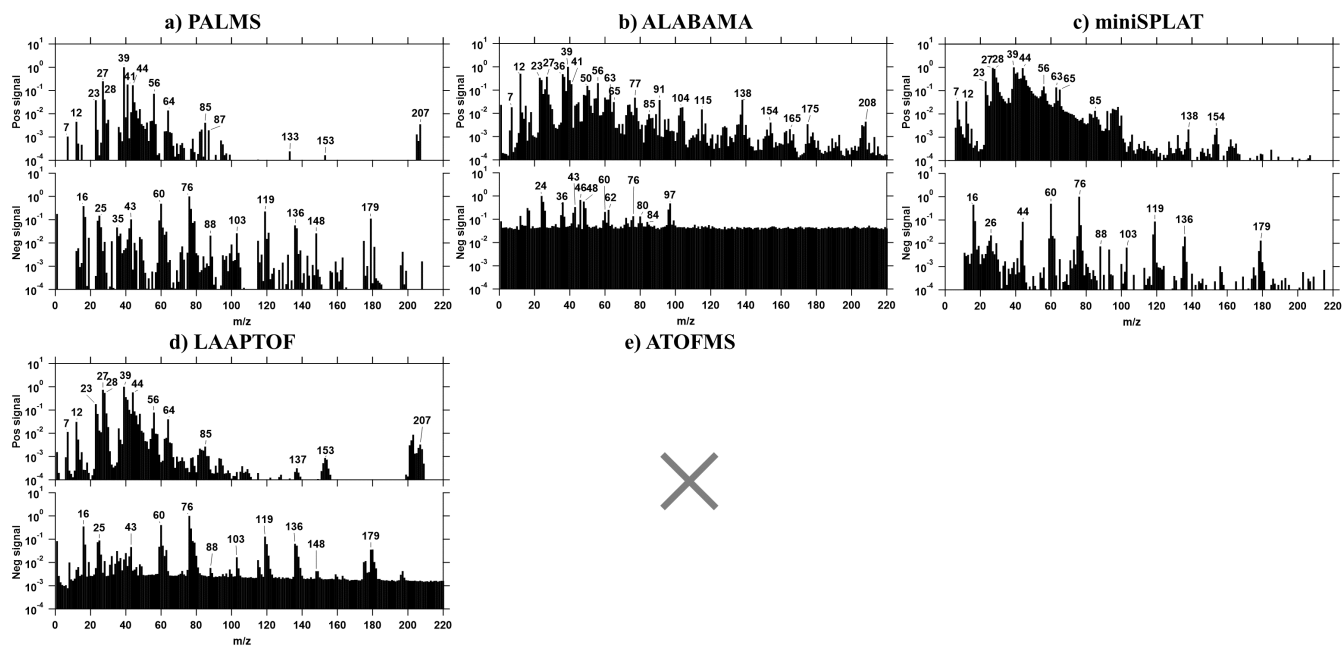

**Figure S3: Normalized average mass spectral signal of K-feldspar from a) PALMS, b) ALABAMA, c) miniSPLAT, d) LAAPTOF, and e) ATOFMS, respectively. The cross “×” symbol denotes the case where no data is available. The number of spectra averaged for each is 687 a), 297 b), 770 c), and 94 d).**

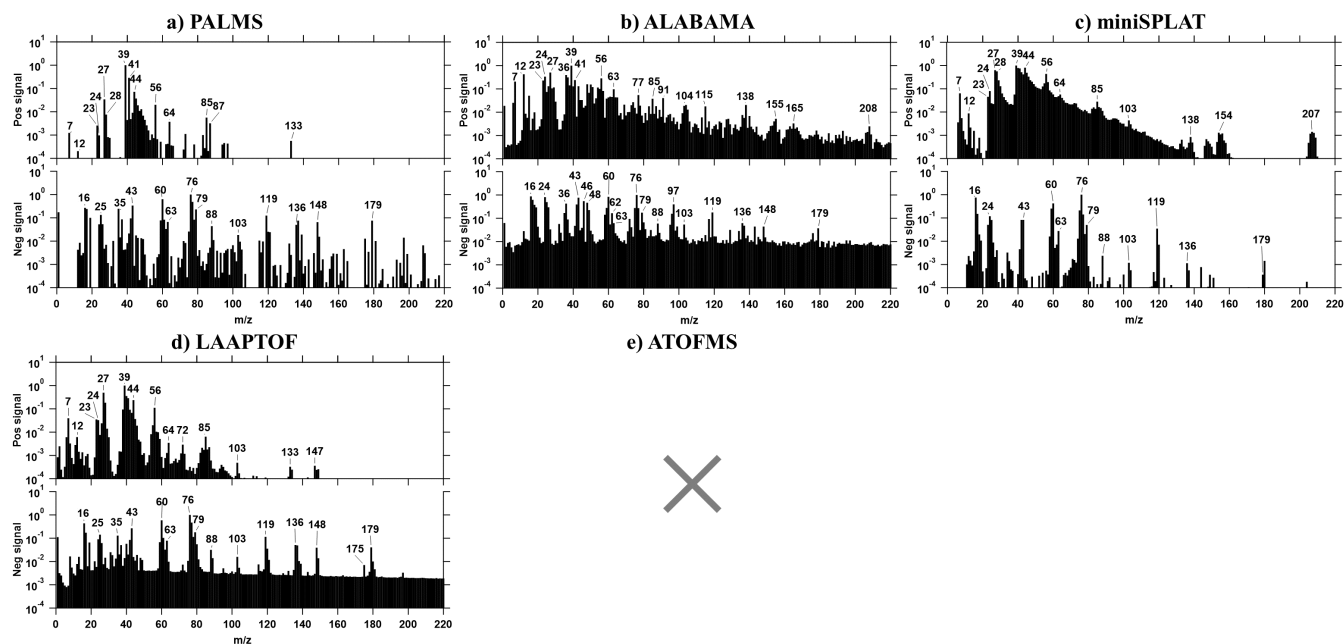

**Figure S4: Normalized average mass spectral signal of illite NX from a) PALMS, b) ALABAMA, c) miniSPLAT, d) LAAPTOF, and e) ATOFMS, respectively. The cross “×” symbol denotes the case where no data is available. The number of spectra averaged for each is 742 a), 142 b), 645 c), and 807 d).**

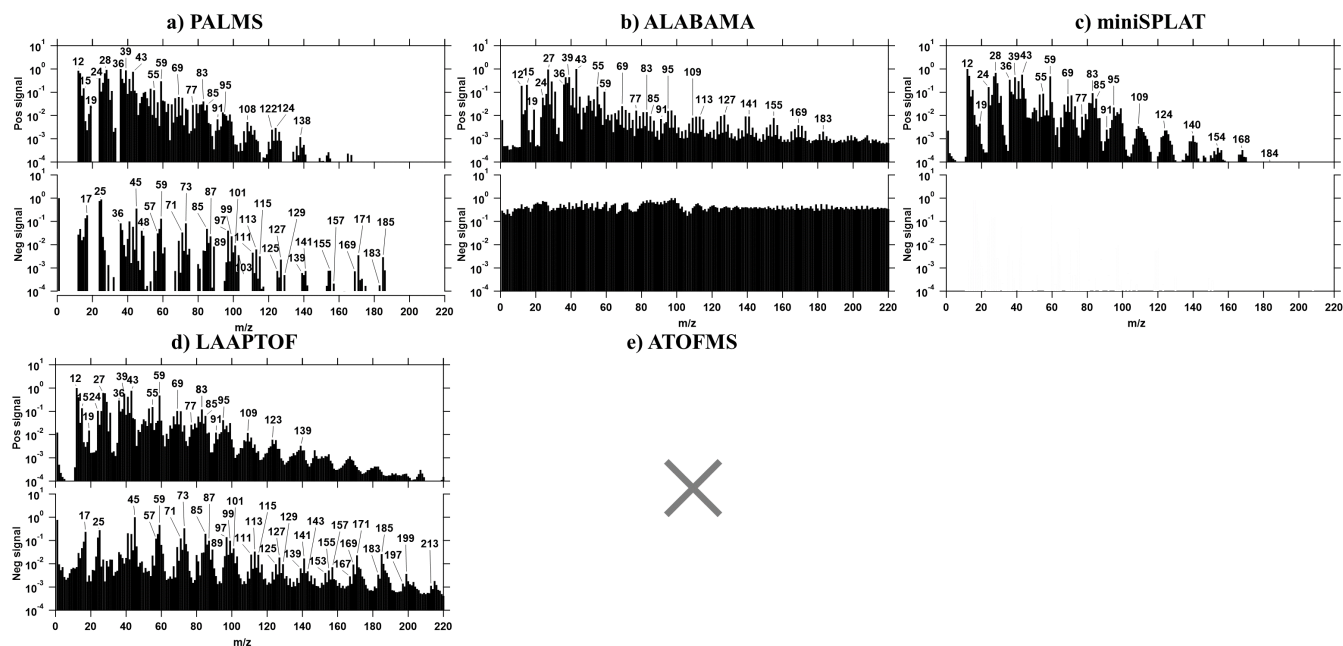

30 **Figure S5: Normalized average mass spectral signal of  $\alpha$ -pinene SOA from a) PALMS, b) ALABAMA, c) miniSPLAT, d) LAAPTOF, and e) ATOFMS, respectively. The cross “×” symbol denotes the case where no data is available. The number of spectra averaged for each is 389 a), 1042 b), 10792 c), and 2818 d).**

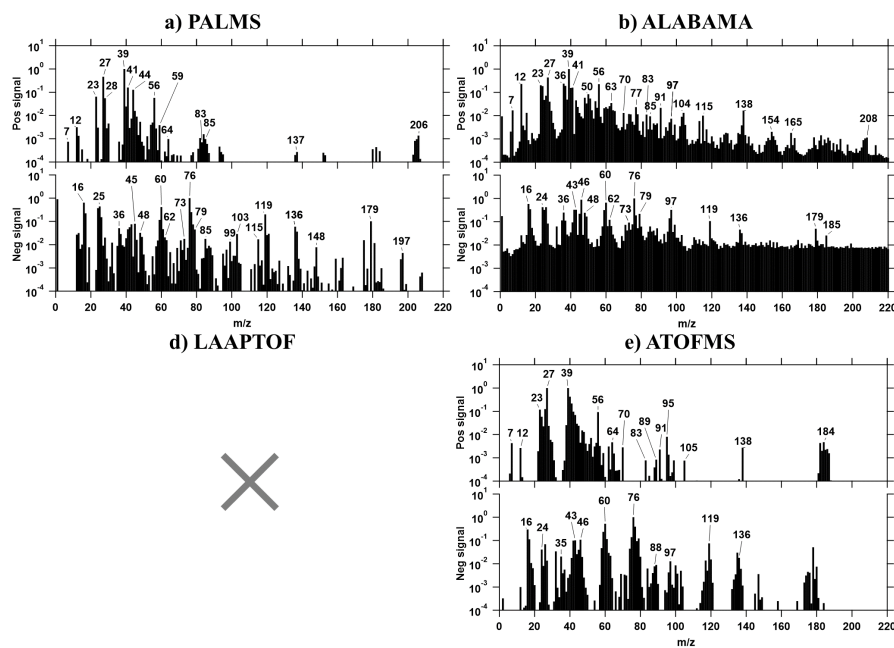

35

**Figure S6: Normalized average mass spectral signal of SOA-coated K-feldspar from a) PALMS, b) ALABAMA, c) miniSPLAT, d) LAAPTOF, and e) ATOFMS, respectively. The cross “×” symbol denotes the case where no data is available. The number of spectra averaged for each is 1674 a), 1067 b), and 363 e).**

40

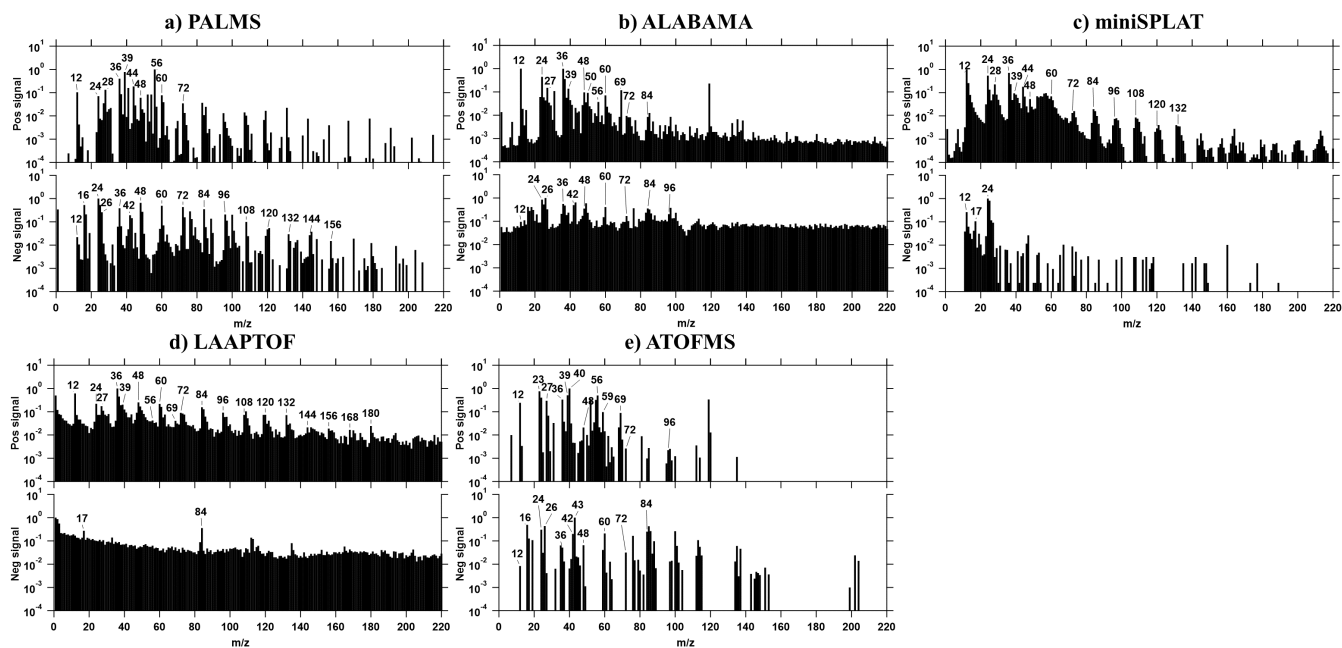

**Figure S7: Normalized averages mass spectral signal of propane soot from a) PALMS, b) ALABAMA, c) miniSPLAT, d) LAAPTOF, and e) ATOFMS, respectively. The number of spectra averaged for each is 73 a), 334 b), 327 c), 339 d) and 30 e).**
